# Supplementary material for: Ultrasensitive optical detection of hydrogen peroxide by triggered activation of horseradish peroxidase
Source: Royal Society of Chemistry journal article supplement (doi:10.1039/c0an00095g), 2010-01-01

## Electronic supplementary information

# Ultrasensitive Optical Detection of Hydrogen Peroxide by Triggered Activation of Horseradish Peroxidase

Ana Virel<sup>a</sup>, Laura Saa<sup>a</sup>, Stephan David Köster<sup>b</sup> and Valeri Pavlov<sup>a\*</sup>

<sup>a</sup> CIC biomaGUNE, Parque Tecnológico de San Sebastian, Paseo Miramon 182, 20009 San Sebastian, Spain. Fax: +34 943 00 53 14; Tel: +34 943 00 53 08; E-mail vpavlov@cicbiomagune.es

<sup>b</sup> Anorganisch-Chemisches Institut, Im Neuenheimer Feld 270, 69120 Heidelberg, Germany. E-mail: David.Koester@ruhr-uni-bochum.de

Figure 1S

*Electron spray mass spectrometry of hemin di(N,N'-acetyl-hydrazide)*

Disolved in MeOH

LS\_10 3 (0.017) Is (1.00,0.10) C<sub>38</sub>H<sub>40</sub>FeN<sub>8</sub>O<sub>4</sub>

TOF MS ES+  
5.80e12

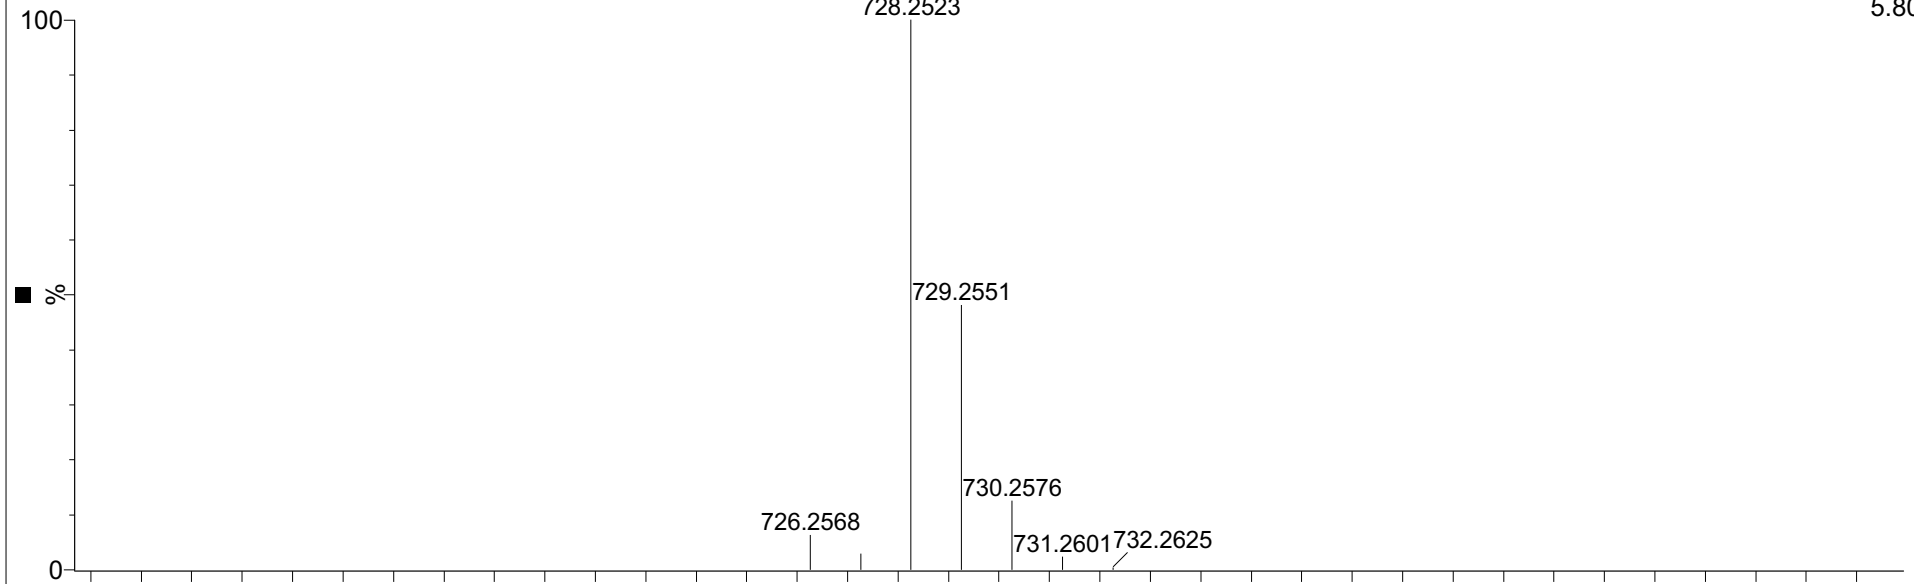

LS\_10 3 50 (0.854) Cm (2:58)

TOF MS ES+  
6.44e4

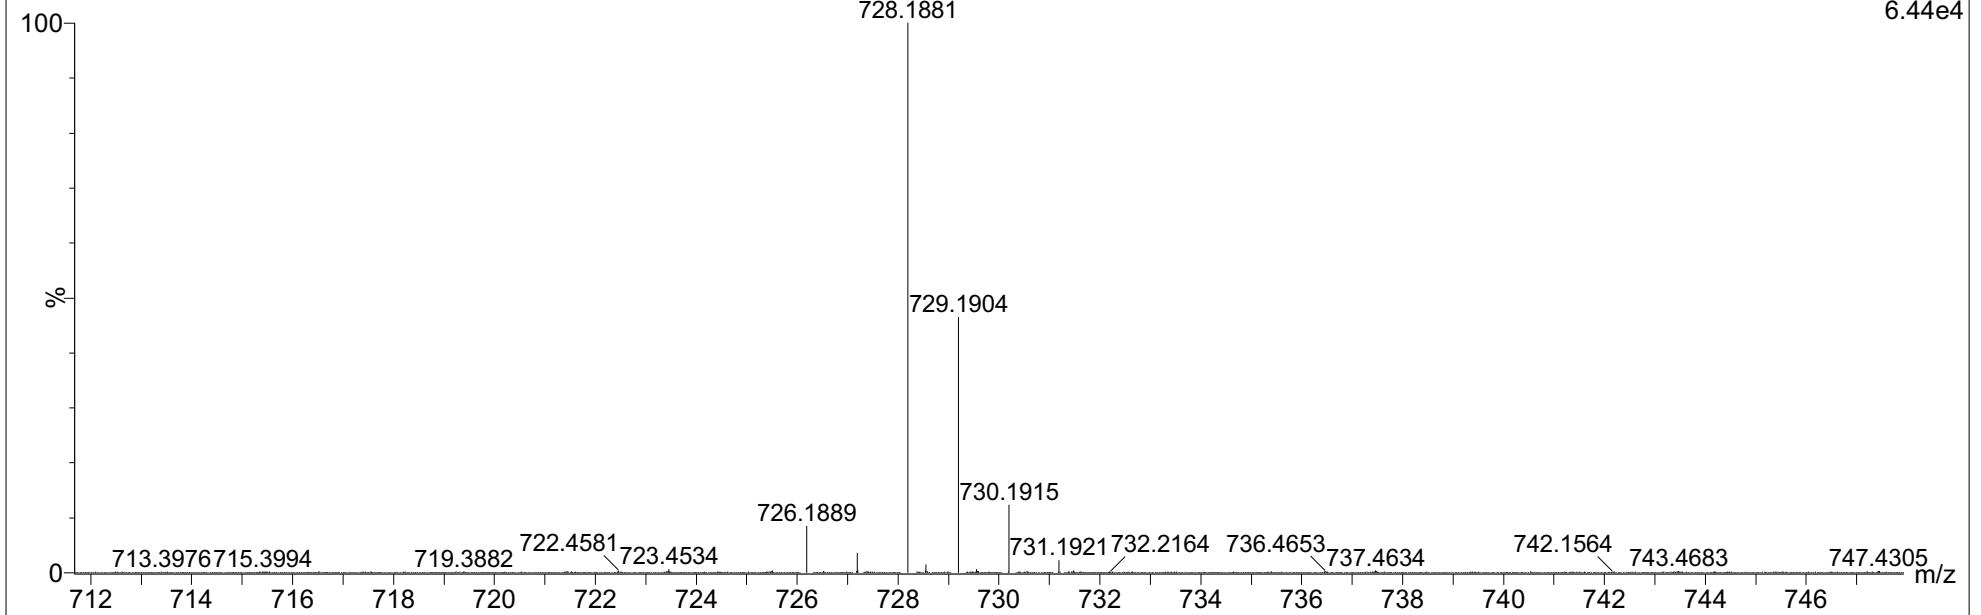

Supplement: c0an00095g.pdf [file c0an00095g.pdf]
